# Supplementary material for: In Situ High-Pressure Raman Spectroscopic, Single-Crystal X-ray Diffraction, and FTIR Investigations of Rutile and TiO2II
Source: MDPI journal article supplement (doi:10.3390/min13050703), 2023-05-21
Supplement: s1 [file s1]

**Table. S1** Unit-cell and atom position parameters for rutile and TiO<sub>2</sub> II

| Rutile      |          |                           | TiO <sub>2</sub> II |          |             |
|-------------|----------|---------------------------|---------------------|----------|-------------|
| <i>a</i>    |          | 4.5969(5)                 | <i>a</i>            |          | 4.5090(46)  |
| <i>c</i>    |          | 2.9607(3)                 | <i>b</i>            |          | 5.4495(60)  |
| <i>V</i>    |          | 62.564(15)                | <i>c</i>            |          | 4.8814(48)  |
| Space group |          | <i>P4<sub>2</sub>/mnm</i> | <i>V</i>            |          | 119.9(2)    |
|             |          |                           | Space group         |          | <i>Pbcn</i> |
| Ti          | <i>X</i> | 0.0                       | <i>X</i>            |          | 0.0         |
|             | <i>Y</i> | 0.0                       | Ti                  | <i>Y</i> | 0.1743(40)  |
|             | <i>Z</i> | 0.0                       |                     | <i>Z</i> | 0.25        |
| O           | <i>X</i> | 0.3055(22)                |                     | <i>X</i> | 0.2705(84)  |
|             | <i>Y</i> | 0.3055(22)                | O                   | <i>Y</i> | 0.3905(91)  |
|             | <i>Z</i> | 0.0                       |                     | <i>Z</i> | 0.4197(12)  |
